# Supplementary material for: Genome-wide association study of knee pain identifies associations with GDF5 and COL27A1 in UK Biobank
Source: PubMed Central journal article supplement (PMC6713725; doi:10.1038/s42003-019-0568-2), 2019-08-28
Supplement: 42003_2019_568_MOESM1_ESM.pdf [file 42003_2019_568_MOESM1_ESM.pdf]

## Supplementary Figures

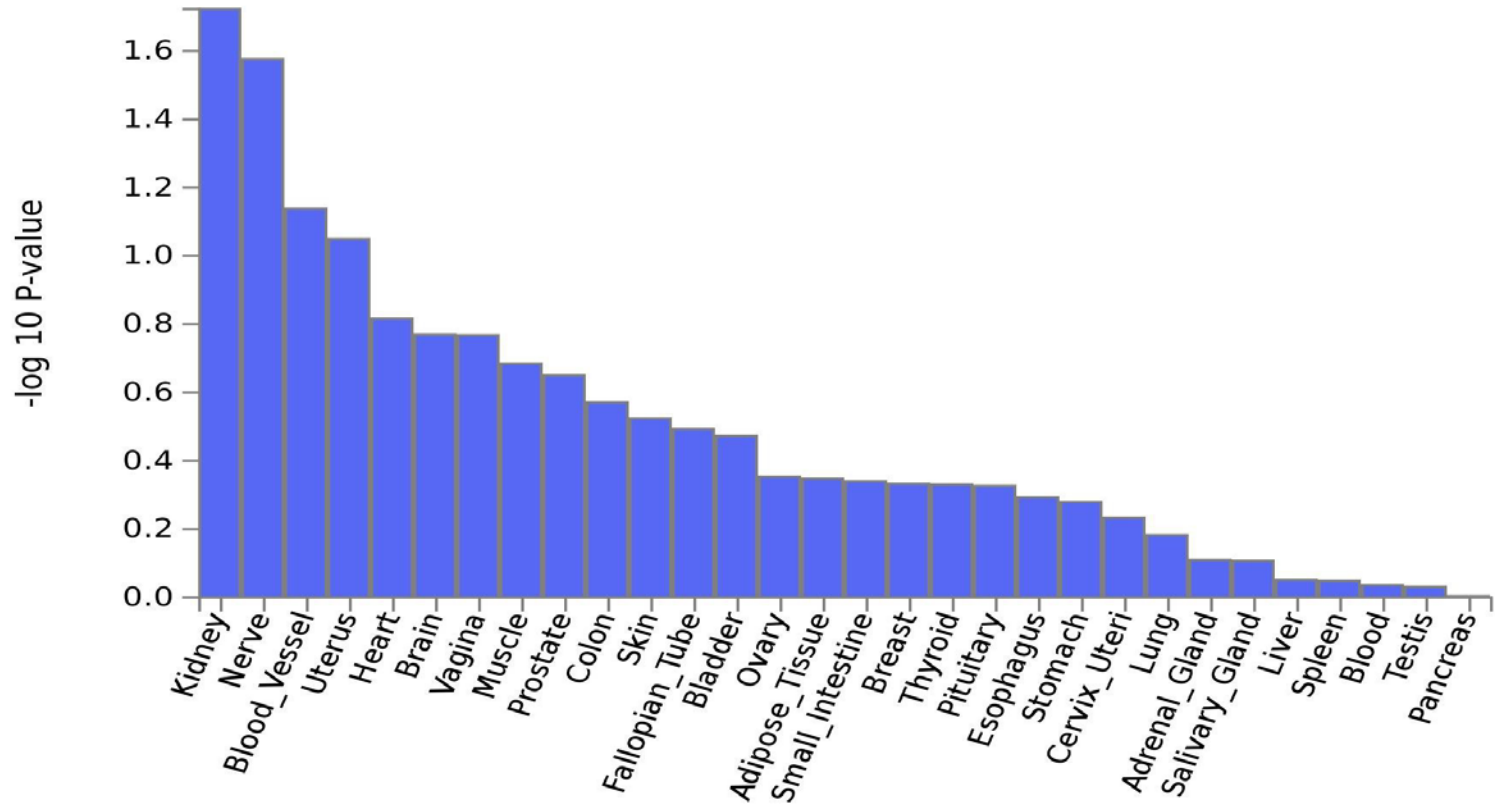

Supplementary figure 1 the tissue expression analysis of 30 general tissues by FUMA

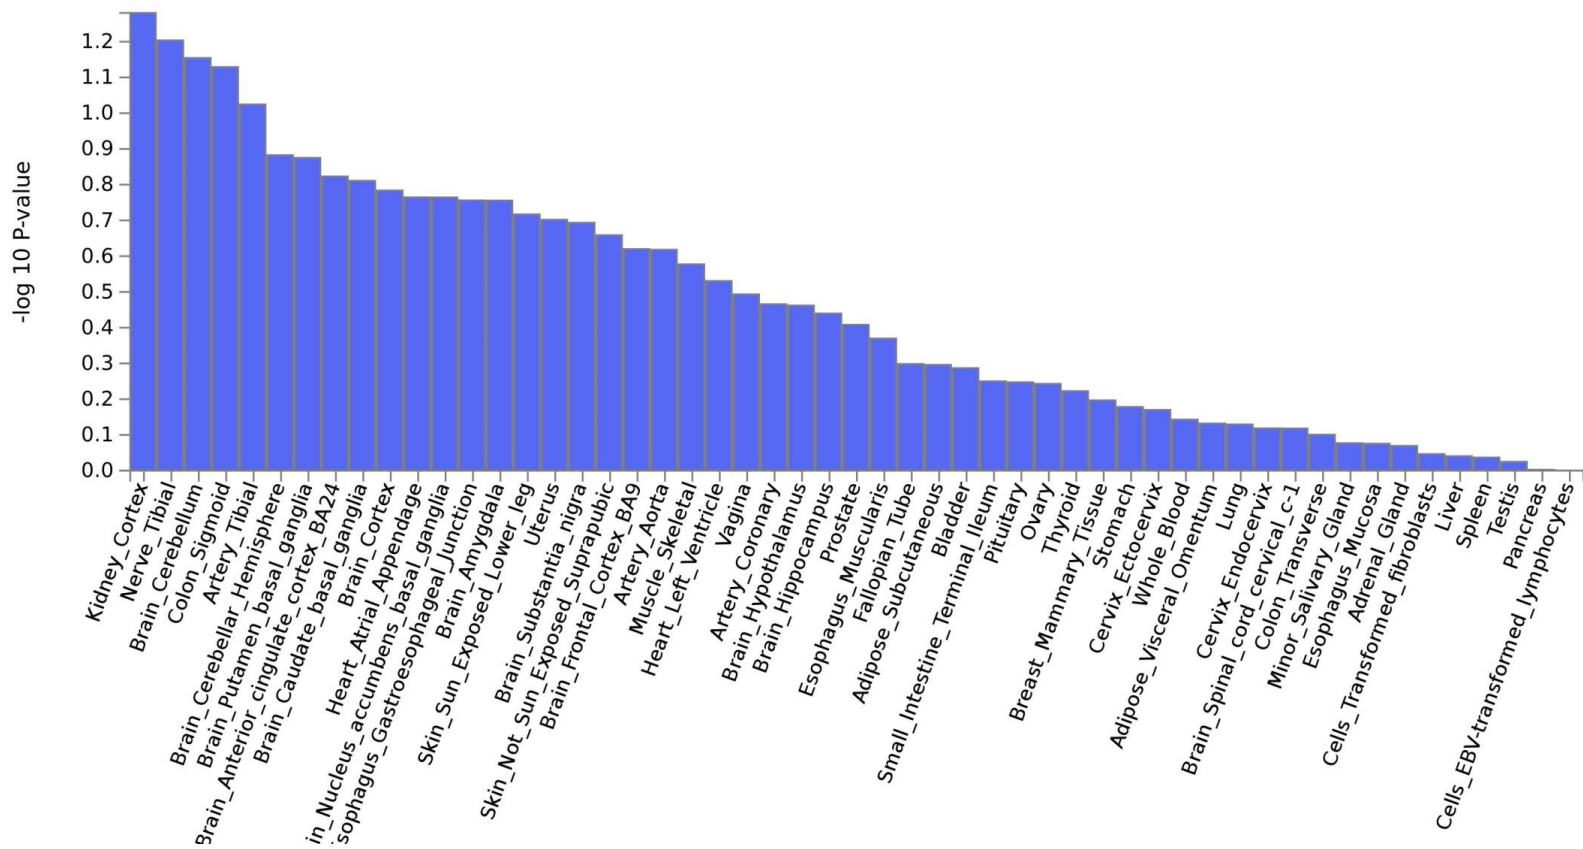

Supplementary figure 2 the tissue expression analysis of 53 specific tissues by FUMA

## Supplementary Tables

Supplementary Table 1: the 11 associated genes of the gene analysis by FUMA

| Gene             | Chromosome | Start     | Stop      | Number of SNPs | Z-STAT | P        |
|------------------|------------|-----------|-----------|----------------|--------|----------|
| <i>GDF5</i>      | 20         | 34021145  | 34042568  | 66             | 6.6939 | 1.09E-11 |
| <i>UQCC1</i>     | 20         | 33890369  | 33999944  | 358            | 6.6671 | 1.30E-11 |
| <i>CEP250</i>    | 20         | 34042985  | 34099804  | 189            | 6.3487 | 1.09E-10 |
| <i>PODXL</i>     | 7          | 131185021 | 131242976 | 297            | 5.2024 | 9.84E-08 |
| <i>C20orf173</i> | 20         | 34111014  | 34117481  | 18             | 5.1655 | 1.20E-07 |
| <i>SPAG4</i>     | 20         | 34203814  | 34208971  | 15             | 5.0917 | 1.77E-07 |
| <i>MTMR3</i>     | 22         | 30279144  | 30426855  | 623            | 4.8555 | 6.00E-07 |
| <i>ERGIC3</i>    | 20         | 34129770  | 34145405  | 50             | 4.8223 | 7.10E-07 |
| <i>FBLN2</i>     | 3          | 13573824  | 13679922  | 701            | 4.6333 | 1.80E-06 |
| <i>CPNE1</i>     | 20         | 34213953  | 34252878  | 143            | 4.5625 | 2.53E-06 |
| <i>CDC42SE2</i>  | 5          | 130581186 | 130734140 | 508            | 4.5372 | 2.85E-06 |

Supplementary Table 2: the top 10 gene sets generated by FUMA

| Full name of the pathways                                        | Number of genes | Beta  | Beta-STD | SE     | <i>P</i>              |
|------------------------------------------------------------------|-----------------|-------|----------|--------|-----------------------|
| Curated_gene_sets:nikolsky_breast_cancer_20q11_amplico           | 31              | 1.44  | 0.0605   | 0.268  | 3.76x10 <sup>-8</sup> |
| GO_cc:go_presynaptic_active_zone                                 | 25              | 0.765 | 0.0288   | 0.187  | 2.16x10 <sup>-5</sup> |
| Curated_gene_sets:biocarta_tid_pathway                           | 13              | 0.776 | 0.0211   | 0.222  | 0.000237              |
| GO_cc:go_anchored_component_of_external_side_of_plasma_membrane  | 19              | 0.697 | 0.0229   | 0.202  | 0.000278              |
| Curated_gene_sets:figueroa_aml_methylation_cluster_7_dn          | 5               | 1.48  | 0.025    | 0.433  | 0.000317              |
| GO_cc:go_intrinsic_component_of_external_side_of_plasma_membrane | 23              | 0.615 | 0.0222   | 0.183  | 0.000402              |
| Curated_gene_sets:traynor_rett_syndrom_dn                        | 15              | 0.746 | 0.0218   | 0.229  | 0.000548              |
| Curated_gene_sets:kegg_tgf_beta_signaling_pathway                | 75              | 0.32  | 0.0208   | 0.0986 | 0.000598              |
| GO_bp:go_embryonic_camera_type_eye_development                   | 32              | 0.537 | 0.0229   | 0.17   | 0.000797              |
| GO_bp:go_mating_behavior                                         | 22              | 0.589 | 0.0208   | 0.188  | 0.000877              |

STD: Standard deviation

SE: Standard error

Supplementary Table 3. Distribution by sex and current age for individuals included in the 23andMe full GWAS

| Phenotype      | Group   | Total   | Male   | Female | (0,30] | (30,45] | (45,60] | (60,Inf] |
|----------------|---------|---------|--------|--------|--------|---------|---------|----------|
| osteoarthritis | case    | 253880  | 80576  | 173304 | 2999   | 17468   | 61923   | 171490   |
|                | control | 1286245 | 605442 | 680803 | 219308 | 371034  | 351348  | 344555   |

Supplementary Table 4. Distribution across 23andMe genotyping platforms for individuals included in the full GWAS

| Group                  | Total   | v1/v2 | v3    | v4     | v5     |
|------------------------|---------|-------|-------|--------|--------|
| osteoarthritis case    | 253880  | 2464  | 21512 | 116307 | 113597 |
| osteoarthritis control | 1286245 | 9873  | 83618 | 535550 | 657204 |
