# Supplementary material for: Genome-wide association study of knee pain identifies associations with GDF5 and COL27A1 in UK Biobank
Source: PubMed Central journal article supplement (PMC6713725; doi:10.1038/s42003-019-0568-2), 2019-08-28
Supplement: 42003_2019_568_MOESM5_ESM.pdf [file 42003_2019_568_MOESM5_ESM.pdf]

## Reporting Summary

Nature Research wishes to improve the reproducibility of the work that we publish. This form provides structure for consistency and transparency in reporting. For further information on Nature Research policies, see [Authors & Referees](#) and the [Editorial Policy Checklist](#).

### Statistics

For all statistical analyses, confirm that the following items are present in the figure legend, table legend, main text, or Methods section.

n/a Confirmed

- The exact sample size ( $n$ ) for each experimental group/condition, given as a discrete number and unit of measurement
- A statement on whether measurements were taken from distinct samples or whether the same sample was measured repeatedly
- The statistical test(s) used AND whether they are one- or two-sided  
*Only common tests should be described solely by name; describe more complex techniques in the Methods section.*
- A description of all covariates tested
- A description of any assumptions or corrections, such as tests of normality and adjustment for multiple comparisons
- A full description of the statistical parameters including central tendency (e.g. means) or other basic estimates (e.g. regression coefficient) AND variation (e.g. standard deviation) or associated estimates of uncertainty (e.g. confidence intervals)
- For null hypothesis testing, the test statistic (e.g.  $F$ ,  $t$ ,  $r$ ) with confidence intervals, effect sizes, degrees of freedom and  $P$  value noted  
*Give  $P$  values as exact values whenever suitable.*
- For Bayesian analysis, information on the choice of priors and Markov chain Monte Carlo settings
- For hierarchical and complex designs, identification of the appropriate level for tests and full reporting of outcomes
- Estimates of effect sizes (e.g. Cohen's  $d$ , Pearson's  $r$ ), indicating how they were calculated

*Our web collection on [statistics for biologists](#) contains articles on many of the points above.*

### Software and code

Policy information about [availability of computer code](#)

Data collection

We do not collect data ourselves. The UK Biobank data was distributed from the UK Biobank. Data of other cohorts (23andMe, OAI, JoCo) were from coauthors.

Data analysis

BEGNIE V1.2 to perform GWAS and GCTA v1.92 to calculate heritabilities. FUMA was the main annotation online tool.

For manuscripts utilizing custom algorithms or software that are central to the research but not yet described in published literature, software must be made available to editors/reviewers. We strongly encourage code deposition in a community repository (e.g. GitHub). See the Nature Research [guidelines for submitting code & software](#) for further information.

### Data

Policy information about [availability of data](#)

All manuscripts must include a [data availability statement](#). This statement should provide the following information, where applicable:

- Accession codes, unique identifiers, or web links for publicly available datasets
- A list of figures that have associated raw data
- A description of any restrictions on data availability

Yes. We included a data availability statement.

### Field-specific reporting

Please select the one below that is the best fit for your research. If you are not sure, read the appropriate sections before making your selection.

- Life sciences       Behavioural & social sciences       Ecological, evolutionary & environmental sciences

## Life sciences study design

All studies must disclose on these points even when the disclosure is negative.

|                 |                                                                                                                                             |
|-----------------|---------------------------------------------------------------------------------------------------------------------------------------------|
| Sample size     | <input type="text" value="The case-control numbers were determined based on a specific pain questionnaire used by the UK Biobank cohort."/> |
| Data exclusions | <input type="text" value="Standard GWAS QC procedures."/>                                                                                   |
| Replication     | <input type="text" value="We used evidence from the 23andMe, OAI, JoCo cohorts."/>                                                          |
| Randomization   | <input type="text" value="N/A"/>                                                                                                            |
| Blinding        | <input type="text" value="Yes."/>                                                                                                           |

## Reporting for specific materials, systems and methods

We require information from authors about some types of materials, experimental systems and methods used in many studies. Here, indicate whether each material, system or method listed is relevant to your study. If you are not sure if a list item applies to your research, read the appropriate section before selecting a response.

### Materials & experimental systems

### Methods

| n/a                                 | Involvement                                                     | n/a                                 | Involvement                                     |
|-------------------------------------|-----------------------------------------------------------------|-------------------------------------|-------------------------------------------------|
| <input checked="" type="checkbox"/> | <input type="checkbox"/> Antibodies                             | <input checked="" type="checkbox"/> | <input type="checkbox"/> ChIP-seq               |
| <input checked="" type="checkbox"/> | <input type="checkbox"/> Eukaryotic cell lines                  | <input checked="" type="checkbox"/> | <input type="checkbox"/> Flow cytometry         |
| <input checked="" type="checkbox"/> | <input type="checkbox"/> Palaeontology                          | <input checked="" type="checkbox"/> | <input type="checkbox"/> MRI-based neuroimaging |
| <input checked="" type="checkbox"/> | <input type="checkbox"/> Animals and other organisms            |                                     |                                                 |
| <input type="checkbox"/>            | <input checked="" type="checkbox"/> Human research participants |                                     |                                                 |
| <input checked="" type="checkbox"/> | <input type="checkbox"/> Clinical data                          |                                     |                                                 |

## Human research participants

Policy information about [studies involving human research participants](#)

|                            |                                                                                                              |
|----------------------------|--------------------------------------------------------------------------------------------------------------|
| Population characteristics | <input type="text" value="A UK Biobank Population between 40-65. Age, sex, BMI were adjusted in the GWAS."/> |
| Recruitment                | <input type="text" value="The recruitment was performed by the UK Biobank team."/>                           |
| Ethics oversight           | <input type="text" value="The ethics was covered by the UK Biobank ethical approval."/>                      |

Note that full information on the approval of the study protocol must also be provided in the manuscript.
